# Supplementary material for: Local rewiring of genome - nuclear lamina interactions by transcription
Source: bioRxiv or medRxiv preprint supplement (doi:10.1101/685255), 2019-06-27

Figure S1

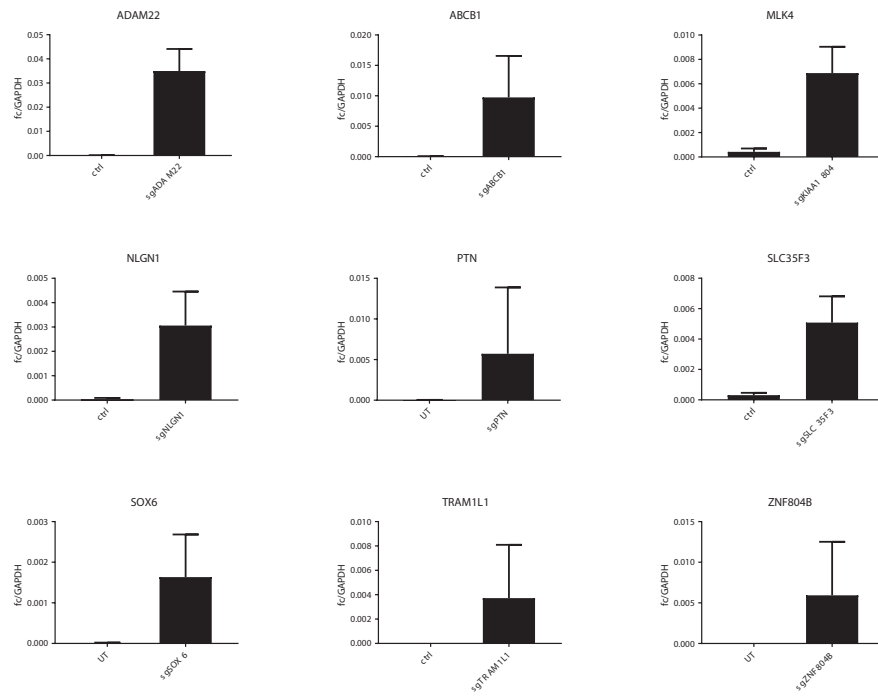

Figure S2

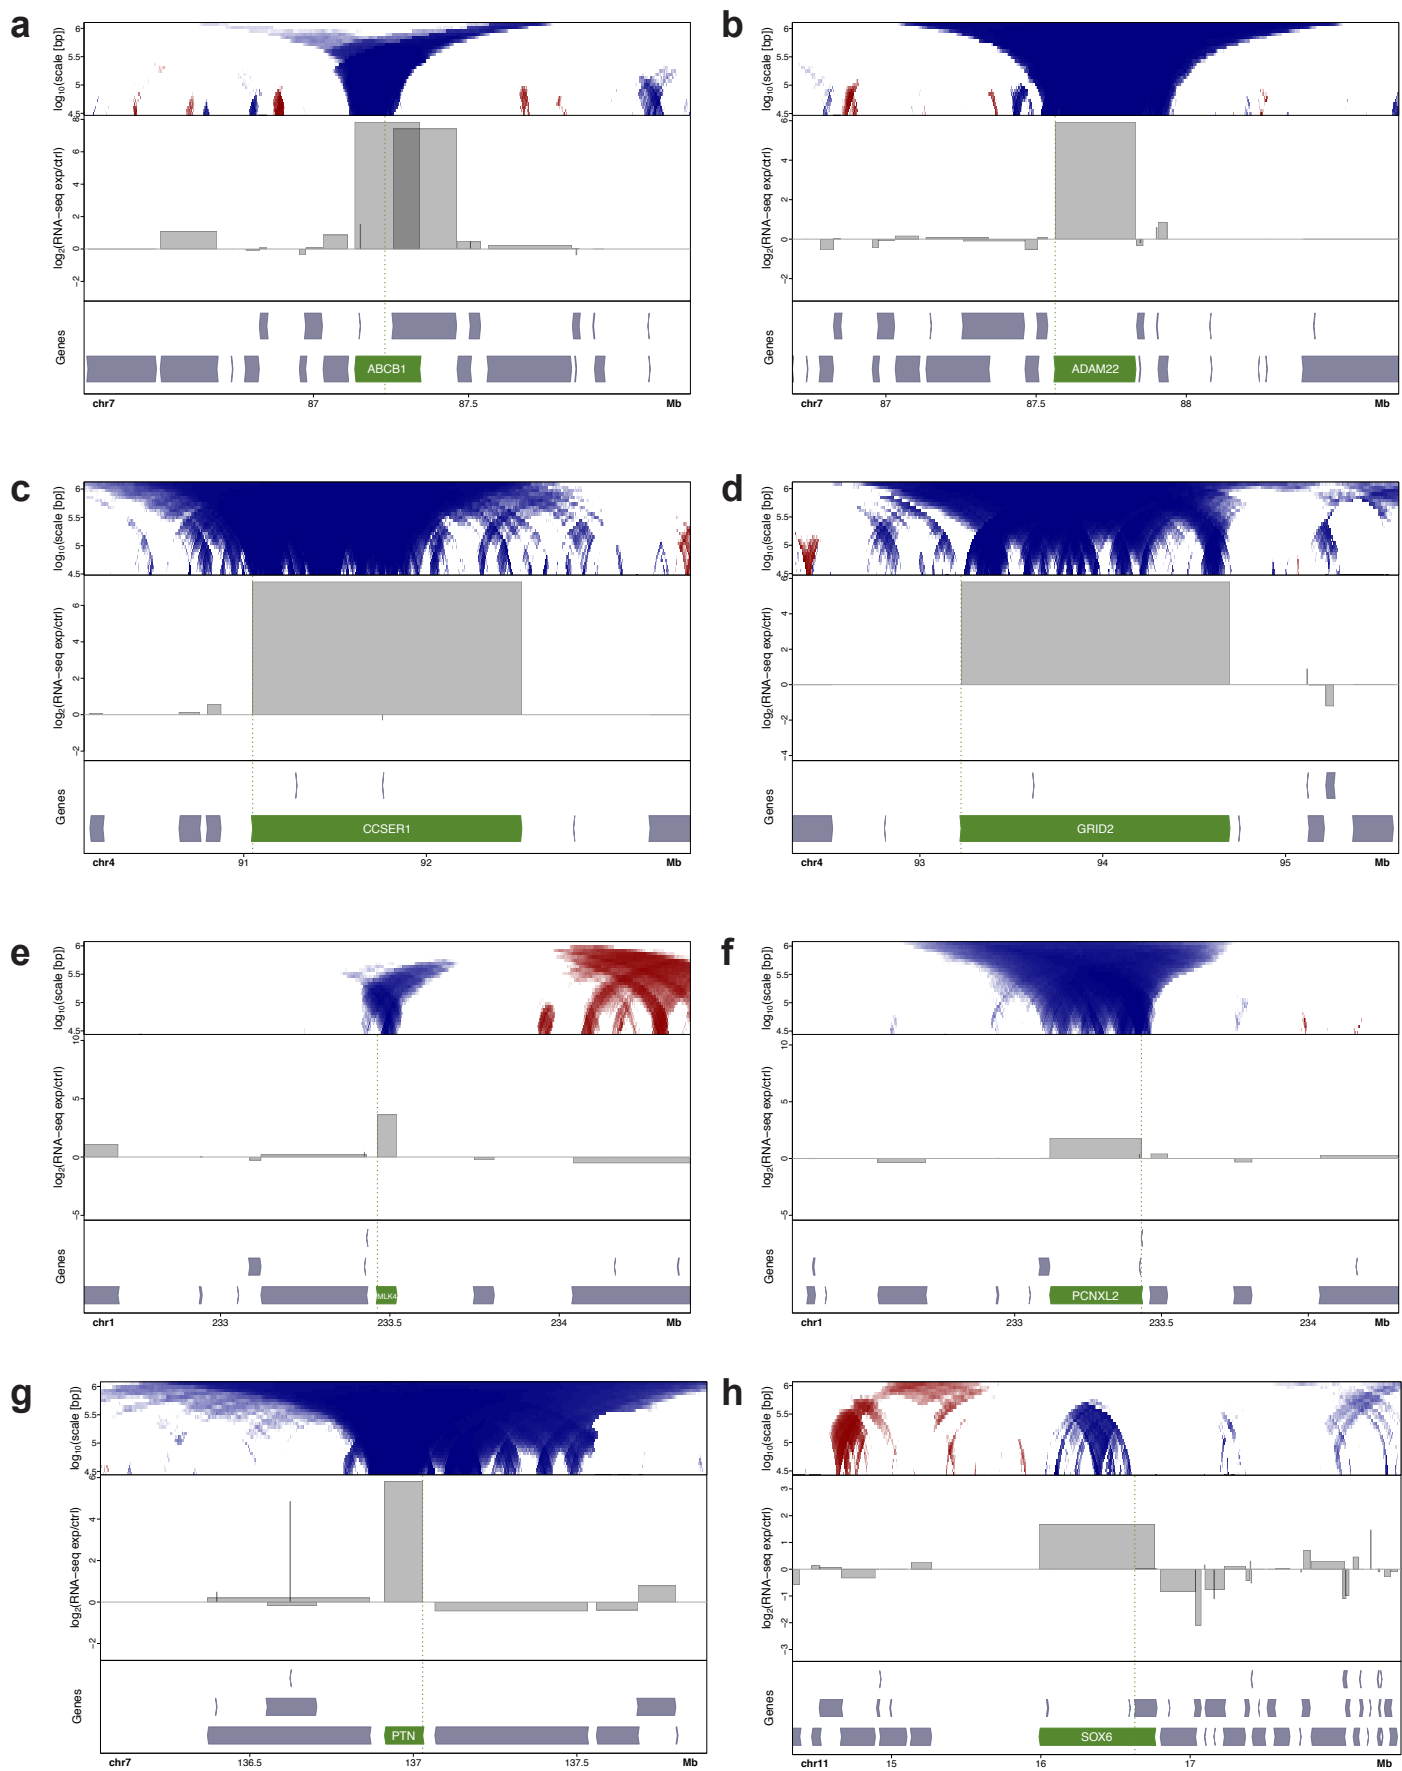

Figure S3

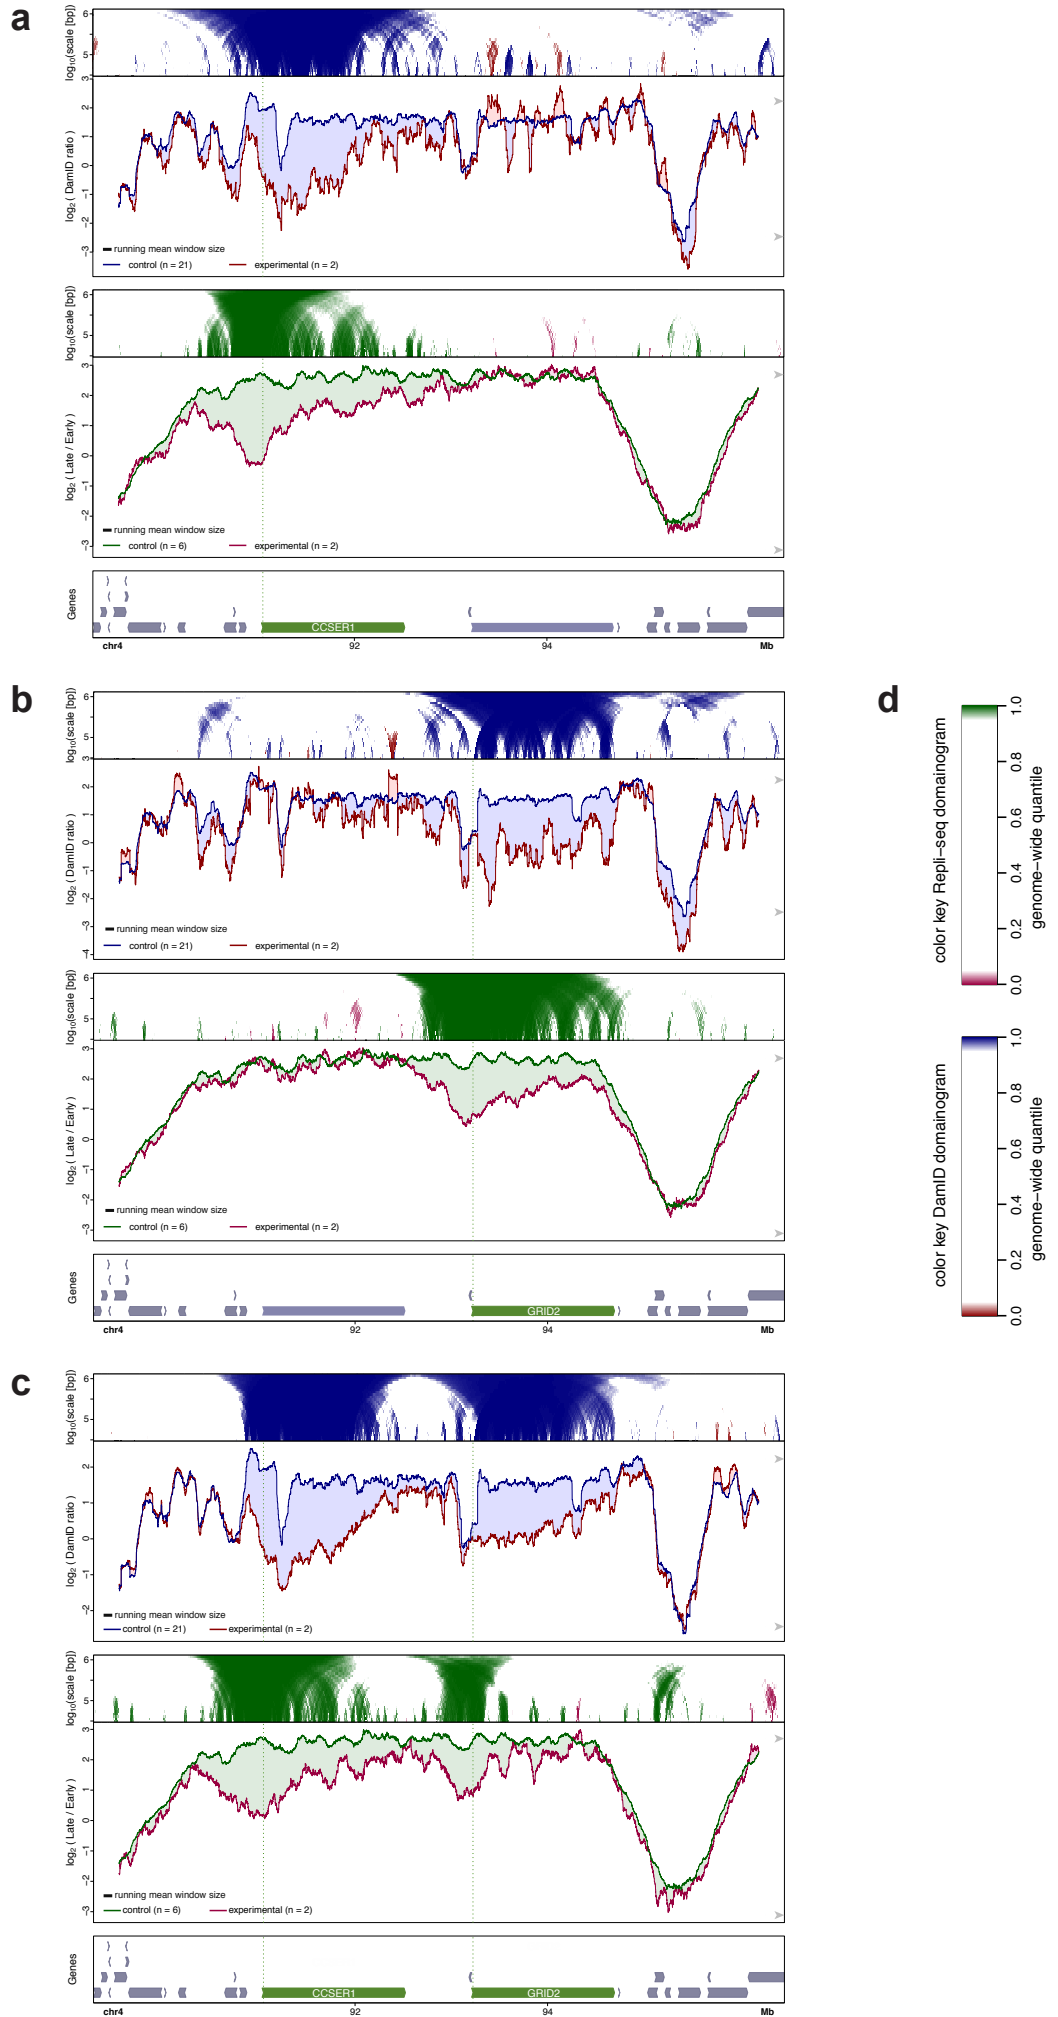

Figure S4

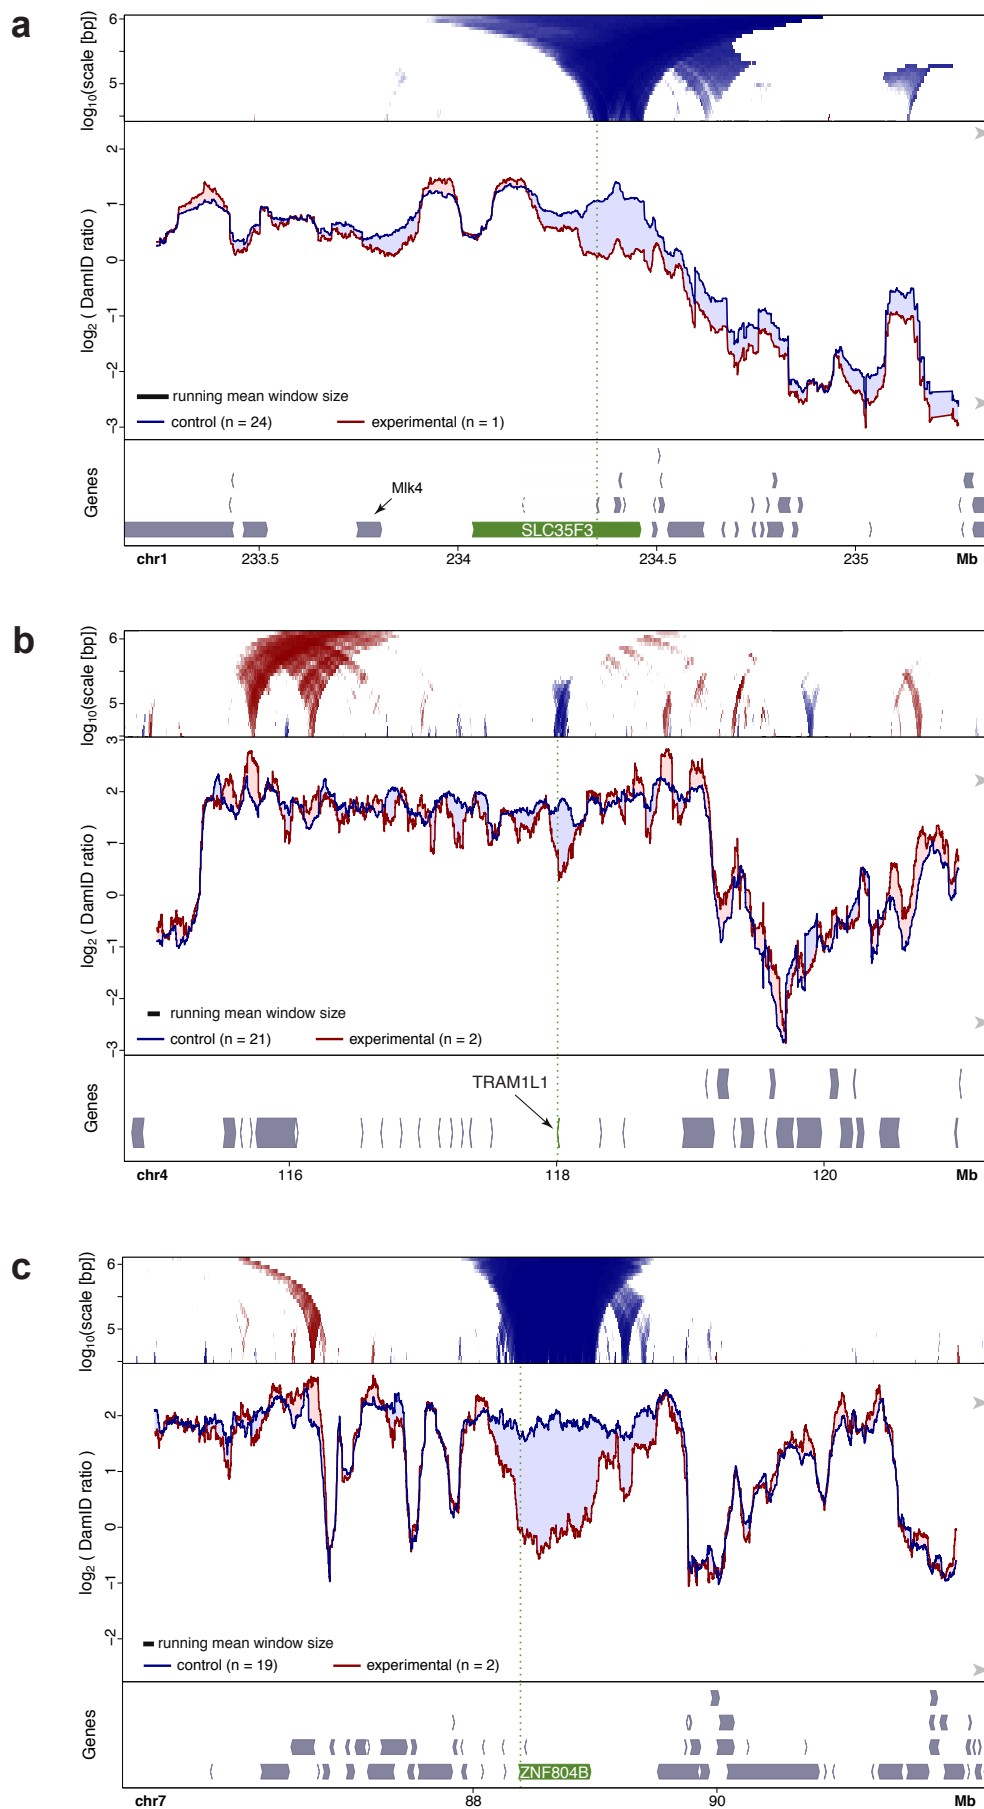

Figure S5

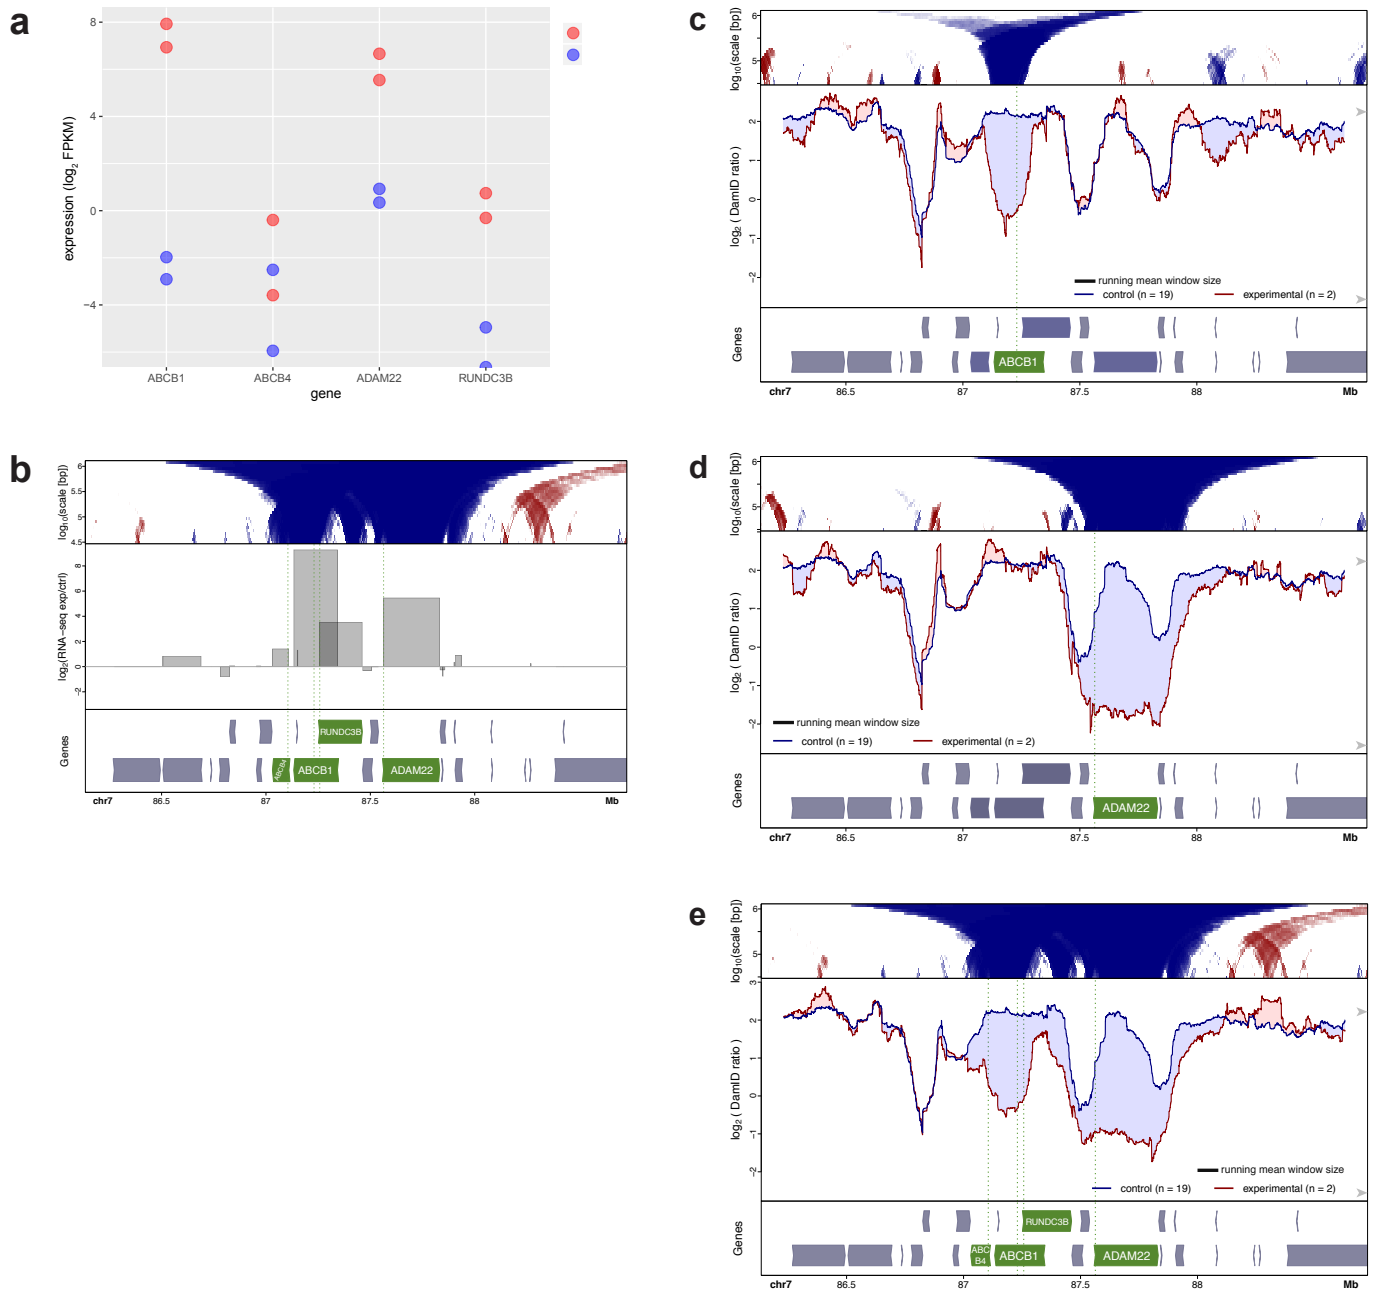

Figure S6

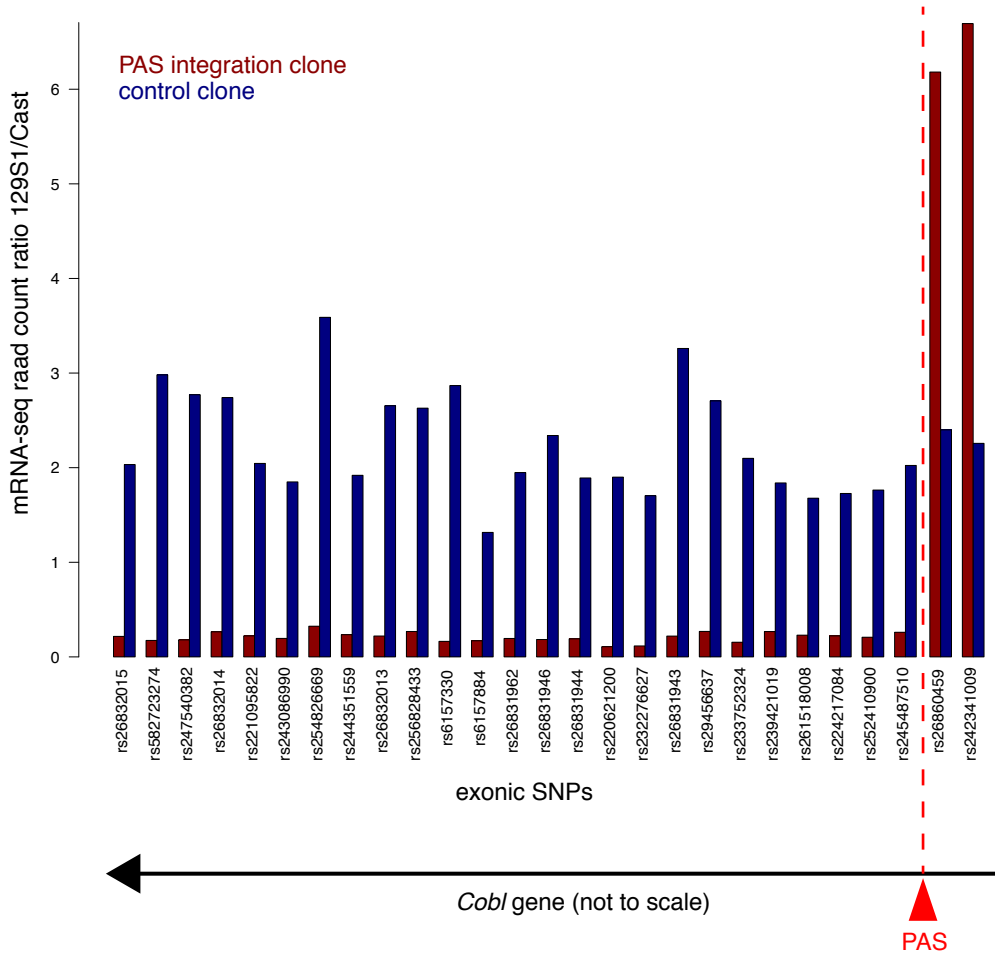

Supplement: Supplementary file [file media-1.pdf]
